# Supplementary material for: Hourly Precipitation Patterns and Extremization over Italy using convection-permitting reanalysis data
Source: Copernicus journal article supplement (doi:10.5194/nhess-26-279-2026), 2026-01-19
Supplement: Supplementary file 1 [file nhess-26-279-2026-supplement.pdf]

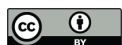

*Supplement of*

## **Hourly Precipitation Patterns and Extremization over Italy using convection-permitting reanalysis data**

**Francesco Cavalleri et al.**

*Correspondence to:* Francesco Cavalleri ([francesco.cavalleri@unimi.it](mailto:francesco.cavalleri@unimi.it))

The copyright of individual parts of the supplement might differ from the article licence.

## Supplementary material (figures)

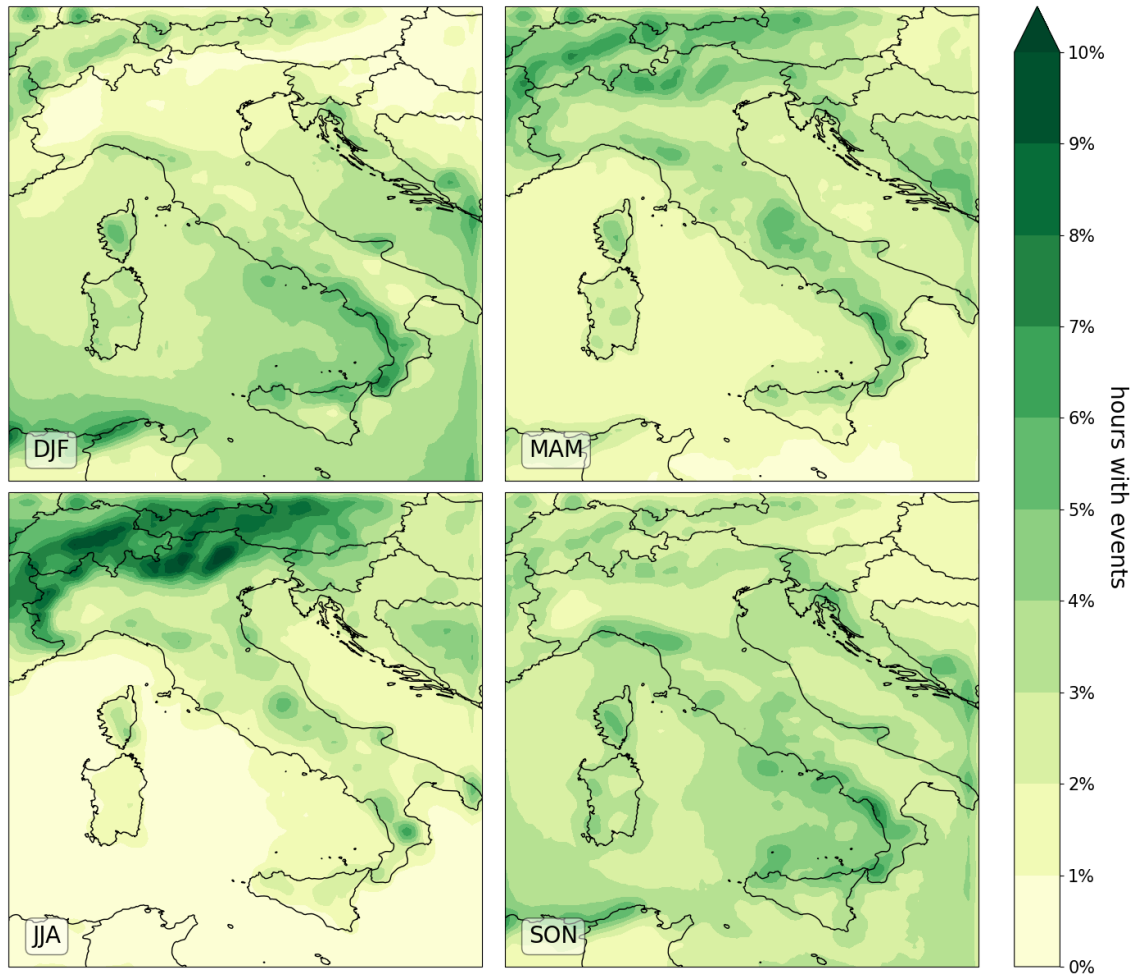

**Figure S1:** Seasonal map of the frequency of wet hours (i.e., the percentage of hours with at least one structure detected in the window) within the 0.5 x 0.5 window (step size 0.1), averaged annually over the period 1986–2022,

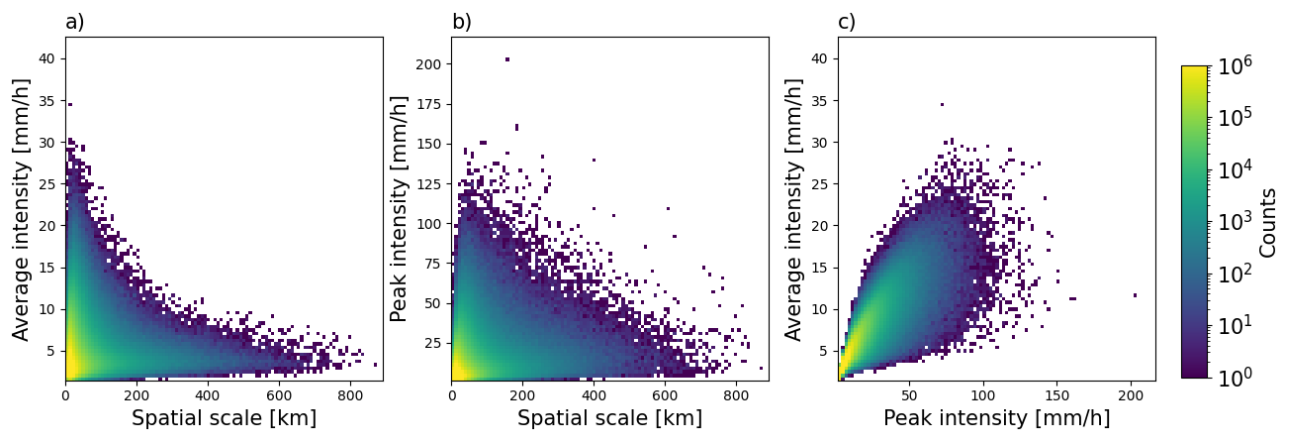

**Figure S2:** Scatter density plots showing the joint distribution of individual precipitation event characteristics over the entire study period. (a) Average intensity (tot\_tp/area) vs. spatial scale (axis\_maj); (b) Peak intensity (tp\_max) vs. spatial scale (axis\_maj); (c) Peak intensity (tp\_max) vs. average intensity (tot\_tp/area). Color scale indicates number of occurrences at each point.

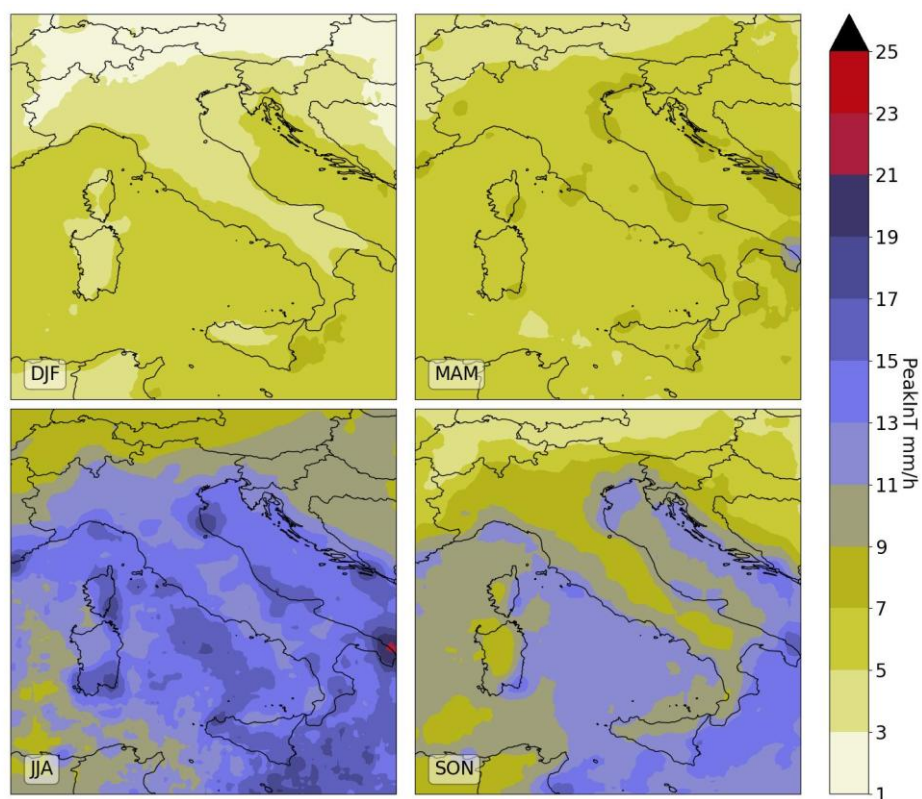

**Figure S3:** Seasonal map of PeakInt of the HPSSs occurring within the 0.5 x 0.5 window (step size 0.1), averaged annually over the period 1986–2022.

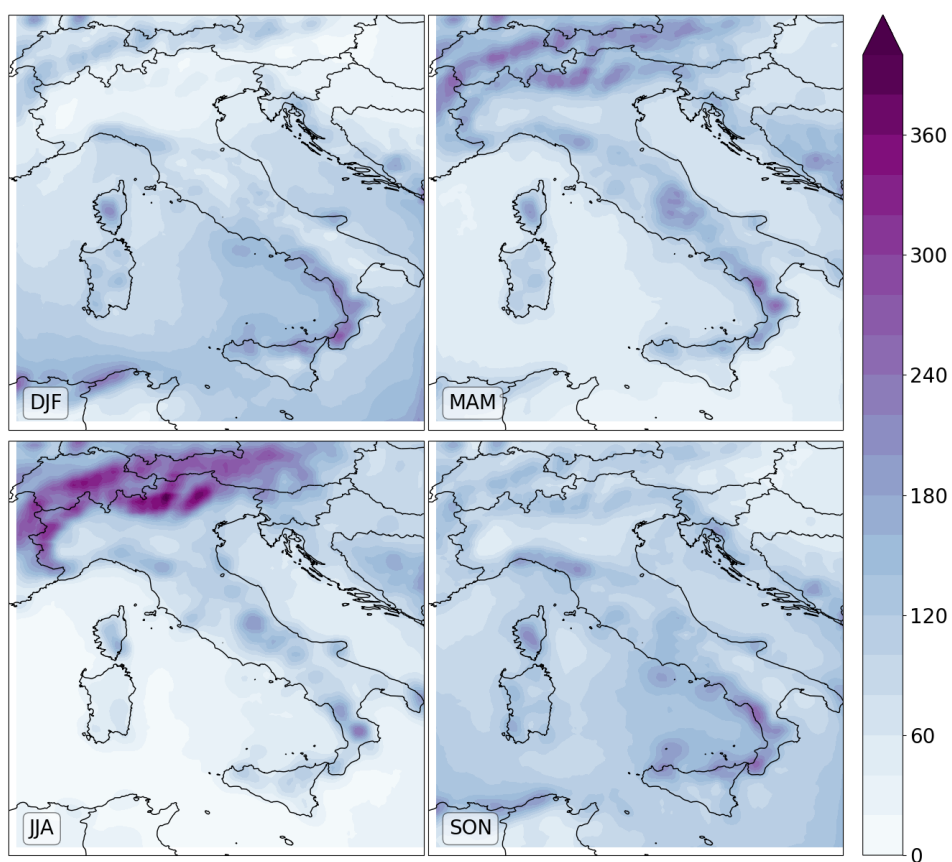

**Figure S4:** Seasonal map of number of events (N) occurring within the 0.5 x 0.5 window (step size 0.1), averaged annually over the period 1986–2022, from the dataset obtained with a fixed 1 mm threshold.

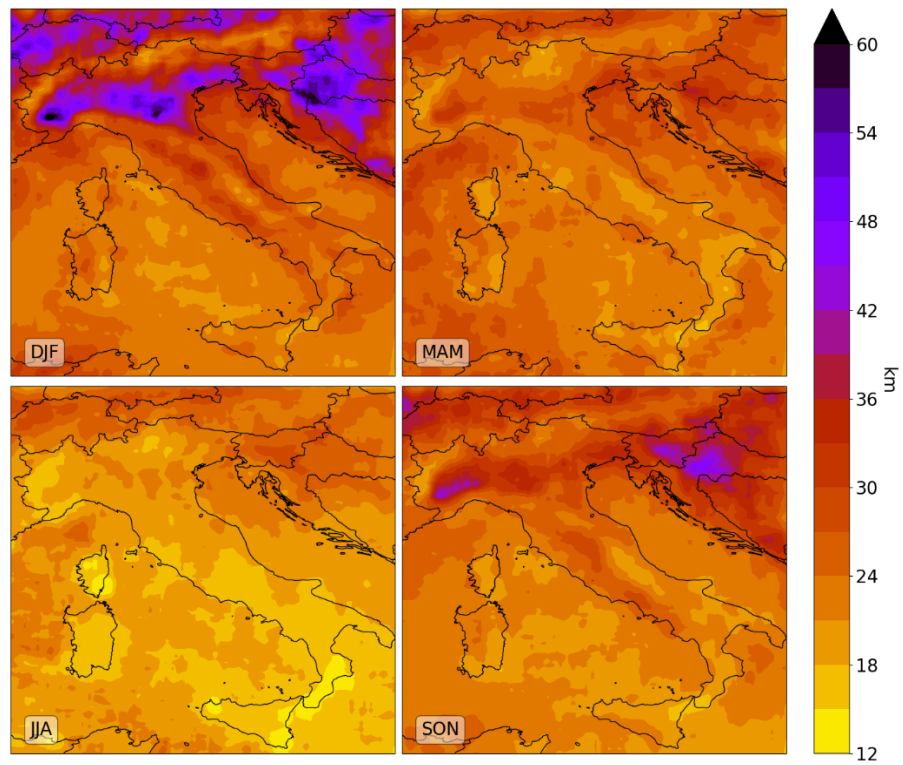

**Figure S5:** Seasonal map of SpatExtent of the events occurring within the 0.5 x 0.5 window (step size 0.1), averaged annually over the period 1986–2022, from the dataset obtained with a fixed 1 mm threshold.

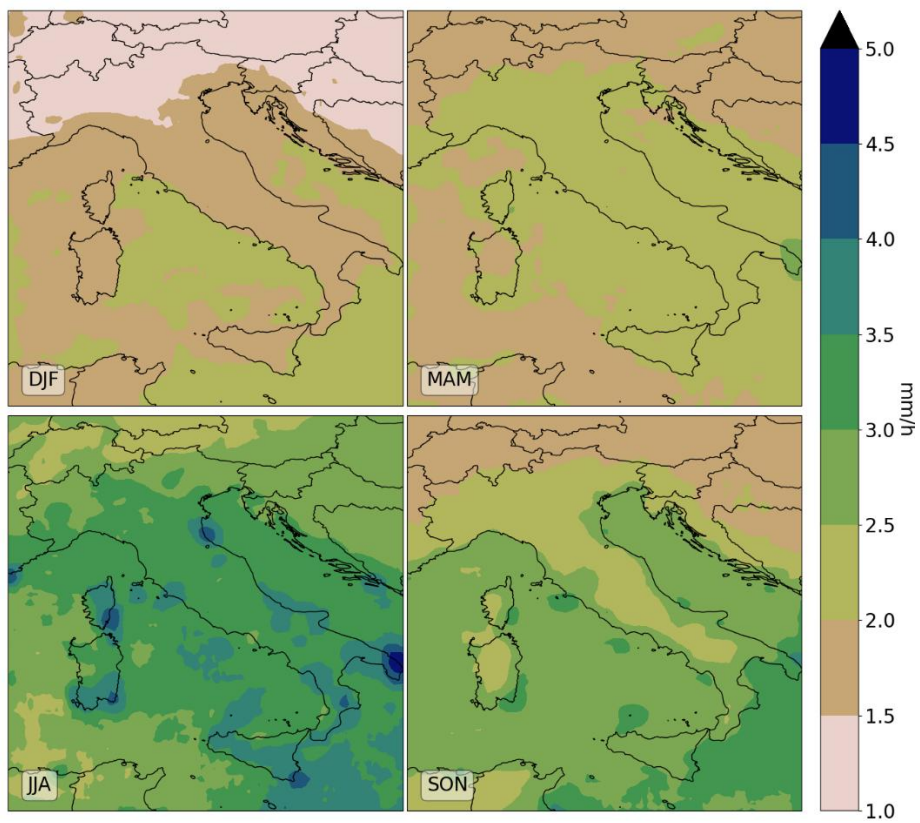

**Figure S6:** Seasonal map of MeanInt of the events occurring within the 0.5 x 0.5 window (step size 0.1), averaged annually over the period 1986–2022, from the dataset obtained with a fixed 1 mm threshold.



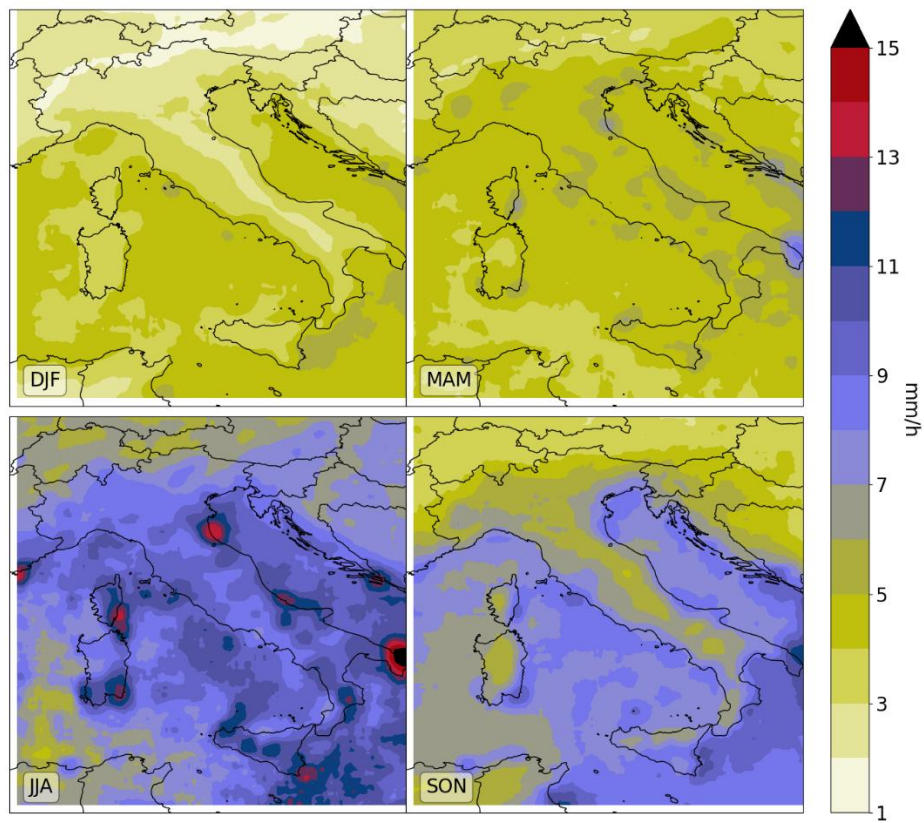

**Figure S7:** Seasonal map of PeakInt of the events occurring within the 0.5 x 0.5 window (step size 0.1), averaged annually over the period 1986–2022, from the dataset obtained with a fixed 1 mm threshold.

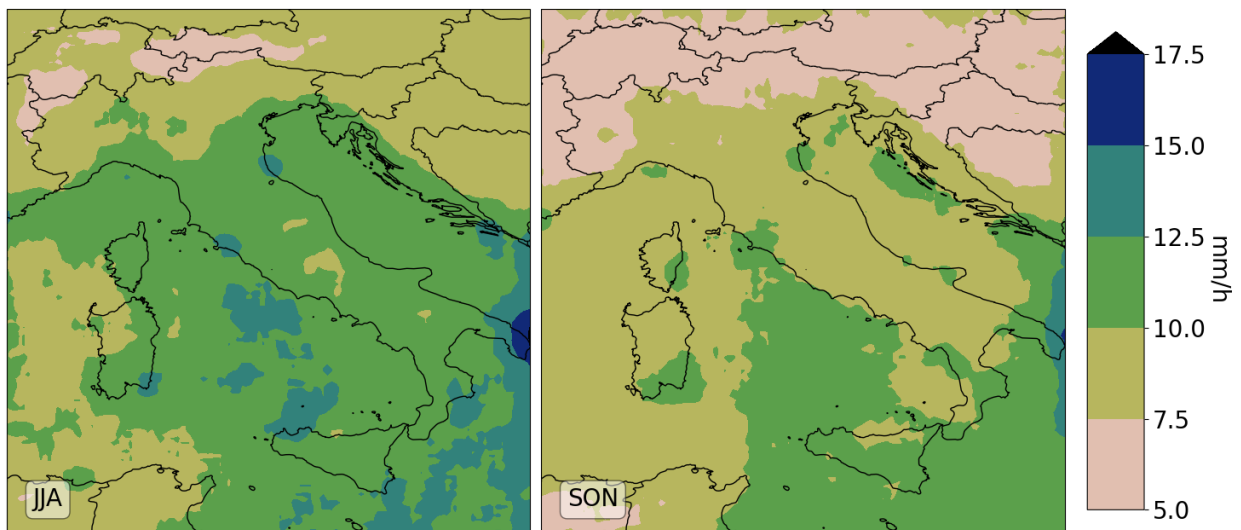

**Figure S8:** JJA and SON maps of MeanInt of HPEs occurring within the 0.5 x 0.5 window (step size 0.1), averaged annually over the period 1986–2022.

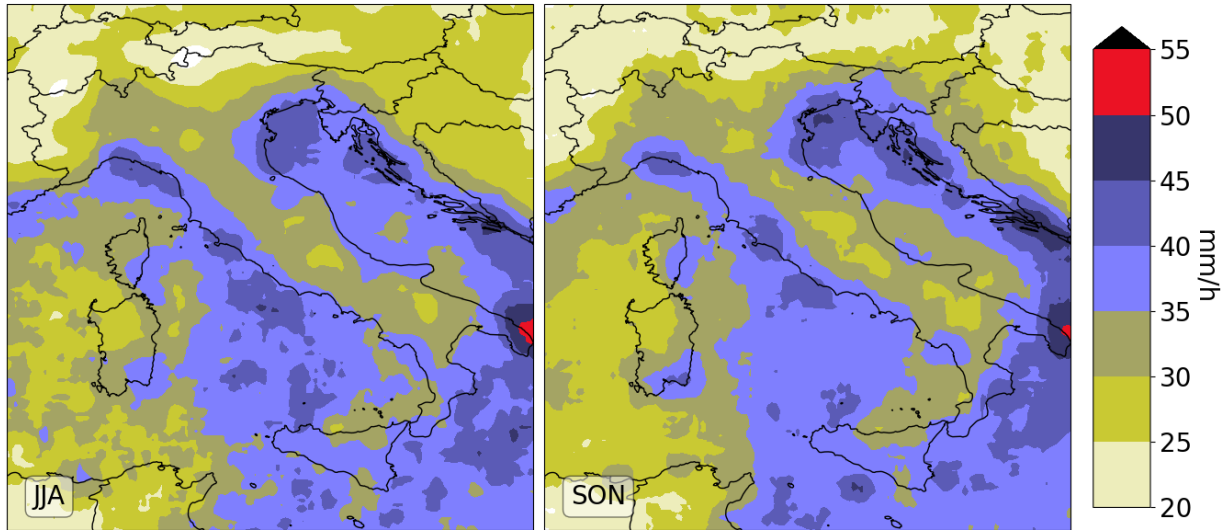

**Figure S9:** JJA and SON maps of PeakInt of HPEs occurring within the  $0.5 \times 0.5$  window (step size 0.1), averaged annually over the period 1986–2022.

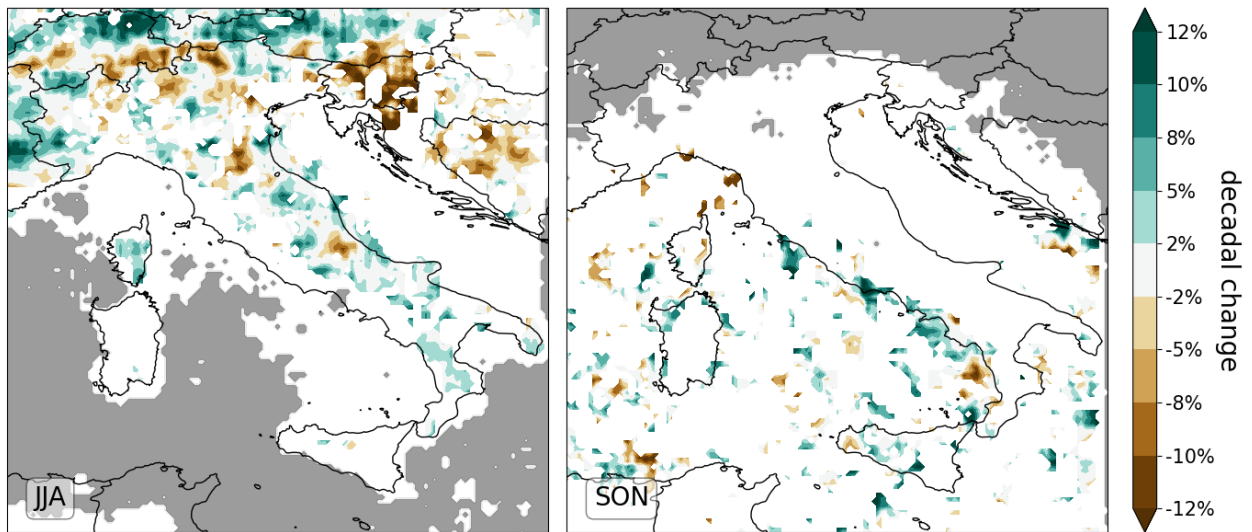

**Figure S10:** Maps of the decadal relative trends in HPEs SpatExtent occurring within each  $0.5^\circ \times 0.5^\circ$  window (sliding step:  $0.1^\circ$ ) for summer (JJA) and autumn (SON). Areas with more than 10 years without EPEs are masked in grey.

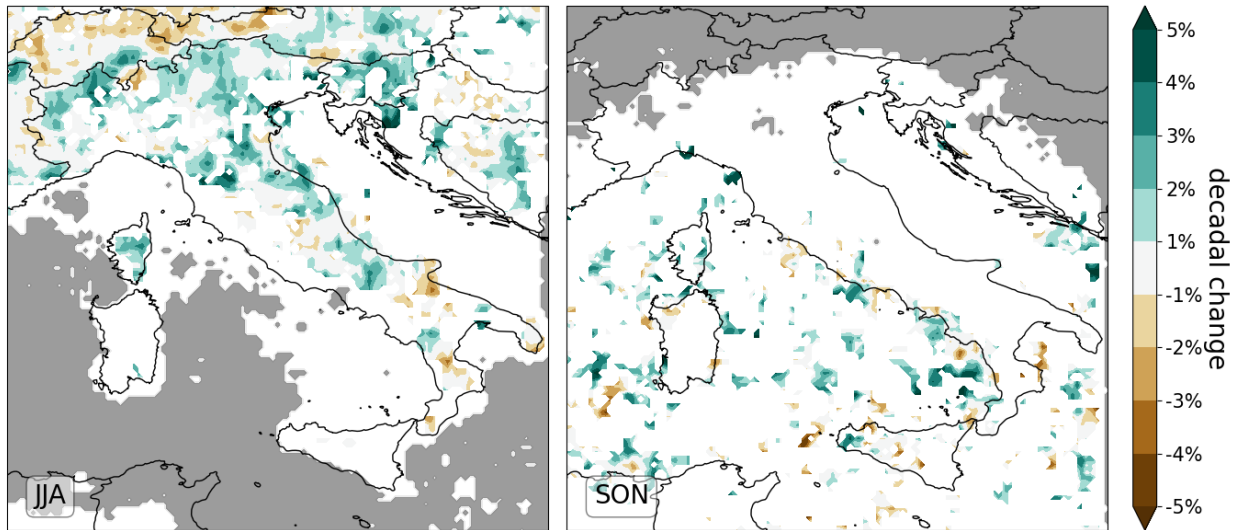

**Figure S11:** Maps of the decadal relative trends in HPEs MeanInt occurring within each  $0.5^\circ \times 0.5^\circ$  window (sliding step:  $0.1^\circ$ ) for summer (JJA) and autumn (SON). Areas with more than 10 years without EPEs are masked in grey.

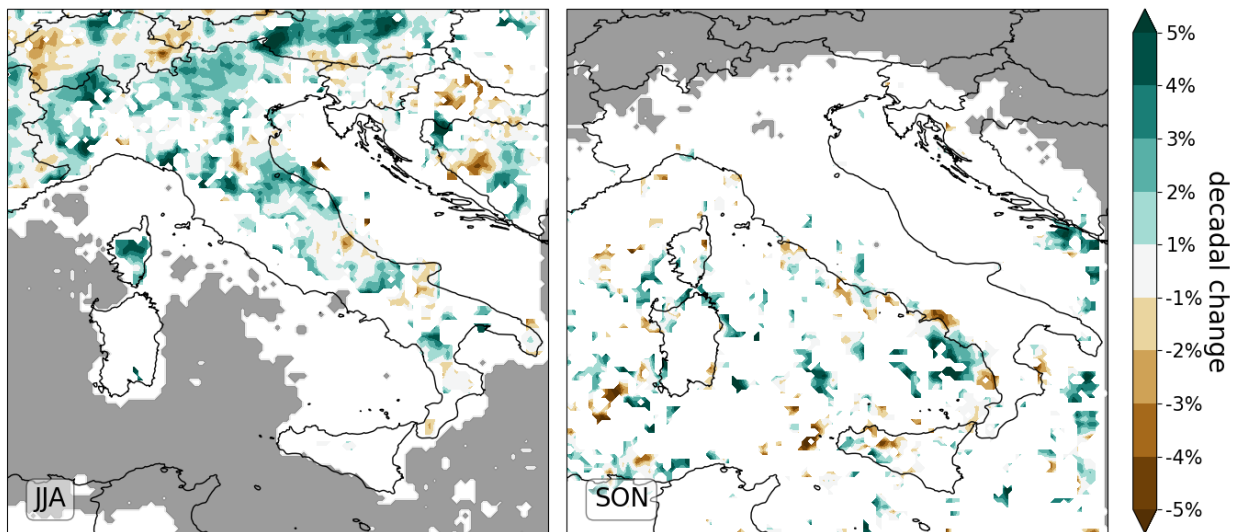

**Figure S12:** Maps of the decadal relative trends in HPEs PeakInt occurring within each  $0.5^\circ \times 0.5^\circ$  window (sliding step:  $0.1^\circ$ ) for summer (JJA) and autumn (SON). Areas with more than 10 years without EPEs are masked in grey.
